# Supplementary material
Source: publisher site journal article supplement (https://www.dovepress.com/article/403723)
Supplement: Supplementary file 1 [file get_supplementary_file.php]

**Appendix 1**

**Survey Questions**

What insights did you gain from participating in the pre-health session(s) at The Baltimore Museum of Art?

Have you engaged in any other facilitated art museum-based experience at Johns Hopkins University (prior to The BMA session[s])?

- Yes
- No

Would you support the integration of art museum-based experiences into the pre-health curriculum at Johns Hopkins?

- Yes
- No

Integration of art museum-based experiences like the one(s) I participated in would enhance the **pre-health programs at** Johns Hopkins.

- Strongly agree
- Agree
- Neutral
- Disagree
- Strongly disagree

Integration of art museum-based experiences like the one(s) I participated in would enhance the care of my **future patients.**

- Strongly agree
- Agree
- Neutral
- Disagree
- Strongly disagree
